# Supplementary material for: The Consumption of Food-Based Iodine in the Immediate Pre-Pregnancy Period in Madrid Is Insufficient. San Carlos and Pregnancy Cohort Study
Source: MDPI journal article supplement (doi:10.3390/nu13124458), 2021-12-14
Supplement: s1 [file s1]

**Table S1 Estimation of Iodine content in food items used for calculation of iodine intake from the adapted DNCT questionnaire.**

| Food Items in DNCT questionnaire  | Specific Food content in a serving                                                                                                                                                                             | Serving (gr) | Iodine content ( $\mu\text{g}/100\text{ g}$ ) per food group serving |                  |
|-----------------------------------|----------------------------------------------------------------------------------------------------------------------------------------------------------------------------------------------------------------|--------------|----------------------------------------------------------------------|------------------|
|                                   |                                                                                                                                                                                                                |              | Mean $\pm$ SD                                                        | Median (Q1-Q3)   |
| Vegetables<br>1436 serving        | Chard (0.05)<br>Onion (0.39)<br>Green beans (0.07)<br>Carrot (0.05)<br>Tomato (0.14)<br>Lettuce (0.25)<br>Spinach (0.05)<br>Pepper (0.08)<br>Zucchini (0.11)<br>Mushroom (0.07)                                | 150          | 24.1 $\pm$ 9.4                                                       | 22.8 (19.5-26.5) |
| Pieces of fruit<br>(1213 serving) | Oranges (0.20)<br>Apples (0.16)<br>Pears (0.07)<br>Strawberries (0.07)<br>Plums (0.02)<br>Peach (0.02)<br>Banana (0.12)<br>Grapes (0.07)<br>Pineapple (0.06)<br>Kiwi (0.02)<br>Apricot (0.08)<br>Melons (0.11) | 160          | 9.9 $\pm$ 9.3                                                        | 7.1 (3.2-14.4)   |
| Nuts<br>(205 serving)             | Walnuts (0.15)<br>Hazelnuts (0.13)<br>Almonds (0.18)<br>Pistachio (0.22)<br>Peanut (0.32)                                                                                                                      | 20           | 2.9 $\pm$ 4.5                                                        | 1.9 (0-4.0)      |
| White fish<br>(276 serving)       | Hake (0.22)<br>Whiting (0.27)<br>Cod (0.16)<br>Sole (0.09)<br>Bass (0.21)<br>Snuff (0.07)                                                                                                                      | 150          | 5.5 $\pm$ 4.3                                                        | 4.5 (1.1-6.7)    |
| Fatty Fish<br>(227 serving)       | Sardine (0.19)<br>Anchovy (0.16)<br>Tuna (0.16)<br>Mackerel (0.11)<br>Trout (0.10)<br>Salmon (0.16)<br>Melva (0.06)<br>Swordfish (0.06)                                                                        | 150          | 14.3 $\pm$ 10.5                                                      | 12.9 (4.5-22.5)  |
| Conservas<br>(273 serving)        | Tuna (0.25)<br>Sardines (0.23)<br>Mackerel (0.12)<br>Mussel (0.17)<br>Melva (0.07)<br>Cockles (0.06)<br>Anchovies (0.11)                                                                                       | 50           | 11.2 $\pm$ 13.5                                                      | 9.8 (1.6-19.5)   |
| Shellfish                         | Mussel (0.24)                                                                                                                                                                                                  | 150          | 24.2 $\pm$ 29.9                                                      | 9.4 (5.2-19.5)   |

|               |                   |
|---------------|-------------------|
| (285 serving) | Prawns (0.30)     |
|               | Clams (0.11)      |
|               | Squid (0.21)      |
|               | Octopus (0.08)    |
|               | Crustacean (0.07) |

Foods that did not reach 1% consumption (0.01 of serving) were not taken into account
